# Supplementary material for: Empty Pericarp21 encodes a novel PPR-DYW protein that is required for mitochondrial RNA editing at multiple sites, complexes I and V biogenesis, and seed development in maize
Source: PLoS Genet. 2019 Aug 2;15(8):e1008305. doi: 10.1371/journal.pgen.1008305 (PMC6693784; doi:10.1371/journal.pgen.1008305)
Supplement: S1 Dataset — (XLSX) [file pgen.1008305.s001.xlsx]

## Sheet: the number of reads 
Dataset S1. Number of reads at each editing site (gene position) for each library. C: number of unedited reads, T: number of edited reads, WT-1%: T/(T+C)% in WT-1, WT-2%: T/(T+C)% in WT-2, emp21-1%: T/(T+C)% in emp21-1, emp21-2%: T/(T+C)% in emp21-2. The line segment (—) means that T read is zero in the editing site. The credible reads when QUAL ≥ 300.
		WT-1						emp21-1						WT-2						emp21-2
Gene	Position from ATG	C	T	T+C	WT-1%	QUAL		C	T	T+C	emp21-1%	QUAL		C	T	T+C	WT-2%	QUAL		C	T	T+C	emp21-2%	QUAL
atp1	30	981	1169	2150	54.3721	11619.4		1506	518	2024	25.5929	4084.44		1741	732	2473	29.5997	5794.77		1478	584	2062	28.322	4148.1
atp1	1178	241	9535	9776	97.5348	111074		401	9132	9533	95.7936	101569		326	6461	6787	95.1967	79699.4		207	7773	7980	97.406	90052.1
atp1	1292	220	8436	8656	97.4584	92341.1		—	—	—	—	—		616	8669	9285	93.3656	95751.8		—	—	—	—	—
atp1	1490	37	2380	2417	98.4692	30120.1		63	1956	2019	96.8796	23858.1		54	2793	2847	98.1033	33857.8		48	1978	2026	97.6308	25616.1
atp1	1499	143	2045	2188	93.4644	20184.4		215	1653	1868	88.4904	16176.1		200	2264	2464	91.8831	22071.1		148	1584	1732	91.455	14915.4
atp4	40	129	2531	2660	95.1504	28873.4		396	2622	3018	86.8787	28220.1		159	2695	2854	94.4289	29585.1		145	2920	3065	95.2692	32640.4
atp4	56	83	2849	2932	97.1692	37913.1		333	2887	3220	89.6584	31171.4		66	3035	3101	97.8717	39802.1		113	3317	3430	96.7055	43341.1
atp4	59	85	2884	2969	97.1371	31855.1		277	2989	3266	91.5187	32104.8		76	3052	3128	97.5703	34228.4		120	3356	3476	96.5478	36345.1
atp4	71	179	3002	3181	94.3728	32578.4		466	2976	3442	86.4614	30147.4		182	3157	3339	94.5493	33324.8		391	3383	3774	89.6396	34042.8
atp4	76	33	3276	3309	99.0027	37837.1		270	3259	3529	92.3491	34910.1		76	3380	3456	97.8009	44898.4		164	3780	3944	95.8418	40627.1
atp4	89	19	3720	3739	99.4918	46623.8		90	3760	3850	97.6623	46497.8		49	3776	3825	98.719	47035.8		37	4522	4559	99.1884	59818.1
atp4	118	54	3437	3491	98.4532	40170.8		90	3166	3256	97.2359	37761.4		59	3215	3274	98.1979	38124.8		44	4706	4750	99.0737	53636.8
atp4	360	1930	6682	8612	77.5894	65362.8		3239	5861	9100	64.4066	54325.8		2212	6053	8265	73.2365	56601.1		2279	7014	9293	75.4762	69518.1
atp4	407	174	7170	7344	97.6307	78832.1		545	7173	7718	92.9386	74418.1		155	7069	7224	97.8544	77327.1		230	7688	7918	97.0952	87724.8
atp4	428	108	6604	6712	98.3909	75327.4		455	6416	6871	93.378	66748.1		209	6326	6535	96.8018	67942.1		190	6881	7071	97.313	80412.8
atp6	515	452	4578	5030	91.0139	57637.1		505	5113	5618	91.011	61434.8		713	5245	5958	88.0329	57045.4		459	3810	4269	89.2481	45434.8
atp6	531	4631	501	5132	9.76228	1147.77		4915	723	5638	12.8237	3048.44		4850	626	5476	11.4317	1830.1		3110	868	3978	21.82	6538.1
atp6	584	268	4866	5134	94.7799	60770.4		429	4798	5227	91.7926	55574.1		433	4785	5218	91.7018	54803.5		243	3201	3444	92.9443	38039.1
atp6	635	311	4446	4757	93.4623	55072.1		536	4083	4619	88.3958	47614.1		466	5006	5472	91.4839	56824.4		349	3122	3471	89.9453	35831.1
atp6	704	104	5949	6053	98.2818	78160.8		252	5366	5618	95.5144	64828.8		376	7447	7823	95.1937	87060.4		175	5897	6072	97.1179	69286.1
atp6	722	83	5200	5283	98.4289	64474.8		206	5165	5371	96.1646	64083.1		431	6903	7334	94.1233	75789.4		233	5711	5944	96.0801	66671.1
atp6	730	88	5140	5228	98.3168	70548.4		158	5261	5419	97.0843	70083.8		297	7131	7428	96.0016	95463.4		193	5835	6028	96.7983	73679.8
atp6	737	109	5069	5178	97.8949	67291.8		163	5252	5415	96.9898	74531.8		460	6988	7448	93.8238	78436.1		270	5928	6198	95.6438	73408.1
atp6	738	654	4461	5115	87.2141	54708.1		1068	4297	5365	80.0932	50122.4		1068	6338	7406	85.5793	70799.1		1376	4755	6131	77.5567	51885.1
atp6	931	1023	7582	8605	88.1116	81653.1		700	7118	7818	91.0463	74012.4		1390	7285	8675	83.9769	70176.4		1350	8033	9383	85.6123	75964.1
atp6	953	2727	4837	7564	63.9476	47678.8		1724	5284	7008	75.3995	50495.8		2603	5228	7831	66.7603	47293.4		2326	6249	8575	72.8746	56134.4
atp6	995	123	5770	5893	97.9128	68105.4		349	5043	5392	93.5274	54444.1		406	5779	6185	93.4357	58178.1		444	6421	6865	93.5324	60496.8
atp6	1050	2996	351	3347	10.487	597.77		1798	197	1995	9.87469	177.77		2643	746	3389	22.0124	3463.1		3339	699	4038	17.3105	3044.1
atp6	1124	66	3125	3191	97.9317	39206.1		205	2571	2776	92.6153	28576.4		125	2269	2394	94.7786	30970.2		185	2311	2496	92.5881	25594.1
atp6	1132	145	2925	3070	95.2769	33746.4		239	2450	2689	91.1119	29261.1		186	2095	2281	91.8457	22642.4		246	2086	2332	89.4511	25382.4
atp6	1139	144	2773	2917	95.0634	32996.8		334	2236	2570	87.0039	24945.4		210	1960	2170	90.3226	20138.4		392	1748	2140	81.6822	16884.1
atp6	1148	72	2670	2742	97.3742	32238.4		211	2232	2443	91.3631	25479.4		159	1915	2074	92.3337	20854.1		155	1830	1985	92.1914	18957.4
atp6	1175	60	2393	2453	97.554	29076.8		113	2072	2185	94.8284	25419.1		137	1638	1775	92.2817	18034.4		78	1539	1617	95.1763	17071.4
atp6	1186	781	2355	3136	75.0957	30233.1		92	2020	2112	95.6439	25241.4		94	1634	1728	94.5602	20559.8		57	1504	1561	96.3485	17459.4
atp8	58	229	1701	1930	88.1347	17540.4		195	1384	1579	87.6504	13491.8		118	1994	2112	94.4129	21395.1		322	1539	1861	82.6975	14429.8
atp8	123	701	2713	3414	79.4669	25394.8		903	1593	2496	63.8221	13170.8		297	3312	3609	91.7706	32377.4		1076	2427	3503	69.2835	20596.4
atp8	200	439	4697	5136	91.4525	47185.1		314	3209	3523	91.0871	32730.8		293	4818	5111	94.2673	48452.1		585	4956	5541	89.4423	44352.1
atp8	436	533	2051	2584	79.3731	19332.4		990	1579	2569	61.4636	13394.4		304	1724	2028	85.0099	16852.8		711	1150	1861	61.7947	10236.1
atp8	437	190	2410	2600	92.6923	27097.8		—	—	—	—	—		115	1901	2016	94.2956	20059.8		—	—	—	—	—
atp9	20	136	1844	1980	93.1313	18097.4		155	1429	1584	90.2146	12836.1		86	1646	1732	95.0346	16100.4		65	2021	2086	96.884	20138.8
atp9	82	166	2697	2863	94.2019	25910.1		136	1864	2000	93.2	16961.1		119	2058	2177	94.5338	19585.4		90	2815	2905	96.9019	31095.1
atp9	92	264	2659	2923	90.9682	24329.8		179	1821	2000	91.05	16529.4		118	2085	2203	94.6437	20168.1		128	2827	2955	95.6684	26579.8
atp9	134	150	2286	2436	93.8424	24862.8		81	1350	1431	94.3396	15429.8		76	1545	1621	95.3115	18208.8		56	2291	2347	97.614	25554.8
atp9	182	87	2559	2646	96.712	30304.8		68	1725	1793	96.2075	20513.4		74	1928	2002	96.3037	25375.8		52	2559	2611	98.0084	31508.8
atp9	191	229	2274	2503	90.851	22804.1		127	1585	1712	92.5818	16915.4		137	1789	1926	92.8868	18072.8		83	2375	2458	96.6233	28775.8
atp9	212	179	1910	2089	91.4313	19871.4		121	1381	1502	91.9441	15124.1		107	1633	1740	93.8506	18371.4		78	2025	2103	96.291	23983.8
atp9	228	1559	225	1784	12.6121	345.437		1051	287	1338	21.4499	1354.1		1144	410	1554	26.3835	2675.44		1077	734	1811	40.5301	5337.1
ccmB	28	236	1404	1640	85.6098	15846.1		412	1063	1475	72.0678	11052.1		240	1017	1257	80.9069	11065.4		248	847	1095	77.3516	8378.77
ccmB	43	224	1540	1764	87.3016	17726.4		258	1307	1565	83.5144	15792.8		192	1142	1334	85.6072	15138.1		218	961	1179	81.5098	10926.1
ccmB	80	264	1886	2150	87.7209	24456.4		337	1451	1788	81.1521	17155.4		263	1273	1536	82.8776	15679.1		250	1090	1340	81.3433	13209.1
ccmB	87	338	1945	2283	85.1949	21884.8		429	1473	1902	77.4448	15589.4		348	1279	1627	78.6109	12381.1		273	1149	1422	80.8017	12797.8
ccmB	93	1780	575	2355	24.4161	3429.43		1699	348	2047	17.0005	1357.77		1001	681	1682	40.4875	4782.1		1123	368	1491	24.6814	1768.1
ccmB	128	294	1791	2085	85.8993	23644.8		396	1284	1680	76.4286	17732.1		233	1123	1356	82.8171	15930.8		273	998	1271	78.5208	13731.8
ccmB	137	370	2083	2453	84.9164	29679.8		594	1427	2021	70.6086	18041.8		286	1263	1549	81.5365	17833.8		422	1044	1466	71.2142	12452.4
ccmB	149	488	2390	2878	83.0438	29500.1		1066	1383	2449	56.472	13507.4		392	1385	1777	77.9403	16385.8		706	972	1678	57.9261	8776.44
ccmB	154	522	2506	3028	82.7609	33327.8		629	2006	2635	76.129	28033.8		365	1494	1859	80.3658	21207.4		427	1359	1786	76.0918	19186.4
ccmB	172	656	3152	3808	82.7731	44632.8		890	2404	3294	72.9812	32502.8		447	1811	2258	80.2037	25380.8		634	1419	2053	69.1184	18705.1
ccmB	179	689	3382	4071	83.0754	47028.1		766	2738	3504	78.1393	37909.4		477	1888	2365	79.8309	26371.8		474	1679	2153	77.9842	23413.1
ccmB	181	766	3297	4063	81.1469	42067.8		786	2744	3530	77.7337	38905.4		502	1872	2374	78.8543	26490.4		495	1668	2163	77.1151	23662.4
ccmB	183	2368	1777	4145	42.8709	15505.1		2655	979	3634	26.94	6974.77		1610	799	2409	33.1673	6133.1		1387	826	2213	37.3249	6393.1
ccmB	193	913	3623	4536	79.8721	44841.1		1356	2632	3988	65.998	34034.1		605	2034	2639	77.0746	27587.1		1033	1541	2574	59.8679	18713.4
ccmB	194	1205	3397	4602	73.8157	32758.1		1666	2352	4018	58.5366	24469.8		757	1858	2615	71.0516	19294.4		1007	1381	2388	57.8308	12244.8
ccmB	286	1926	6341	8267	76.7026	58660.1		3640	4059	7699	52.7211	37159.4		1903	3610	5513	65.4816	36077.8		2168	2788	4956	56.255	23136.1
ccmB	304	2023	6252	8275	75.5529	58191.1		3521	4329	7850	55.1465	42841.1		1920	3830	5750	66.6087	37963.4		2224	2873	5097	56.3665	23998.8
ccmB	337	3817	3843	7660	50.1697	32197.8		4557	3289	7846	41.9194	25071.4		2901	2664	5565	47.8706	21010.1		3316	1906	5222	36.4994	13012.8
ccmB	338	1403	6020	7423	81.0993	59111.4		2222	5557	7779	71.4359	51371.1		1109	4464	5573	80.1005	47567.1		1330	3881	5211	74.4771	41480.1
ccmB	367	1517	5332	6849	77.8508	67266.1		2475	4632	7107	65.1752	53243.4		1416	4072	5488	74.1983	52299.8		1467	3407	4874	69.9015	41977.4
ccmB	379	2026	4307	6333	68.0088	43286.8		3664	2980	6644	44.8525	26626.4		1573	3645	5218	69.8544	41058.4		2063	2644	4707	56.1717	24750.1
ccmB	392	880	5002	5882	85.0391	55104.4		999	5363	6362	84.2974	67018.8		977	3972	4949	80.2586	48047.8		993	3465	4458	77.7254	42425.8
ccmB	406	4853	620	5473	11.3283	805.103		—	—	—	—	—		3414	1209	4623	26.1518	7692.77		1498	213	1711	12.4489	1467.77
ccmB	424	641	4167	4808	86.6681	49816.4		1255	3994	5249	76.0907	40040.3		781	3301	4082	80.8672	39126.8		1154	2466	3620	68.1215	24147.1
ccmB	428	589	4038	4627	87.2704	49134.4		824	4287	5111	83.8779	57021.4		683	3299	3982	82.8478	45016.8		824	2706	3530	76.6572	35451.1
ccmB	467	558	2691	3249	82.8255	29975.8		861	2494	3355	74.3368	26916.1		580	2108	2688	78.4226	21518.1		540	1534	2074	73.9634	26009.8
ccmB	475	492	2498	2990	83.5452	35165.1		716	2336	3052	76.54	32687.1		529	1982	2511	78.9327	27461.4		783	1469	2252	65.2309	20106.8
ccmB	476	491	2444	2935	83.2709	35136.8		703	2293	2996	76.5354	32552.4		528	1938	2466	78.5888	27391.8		774	1439	2213	65.0249	20056.8
ccmB	485	440	2214	2654	83.4213	31471.1		650	2083	2733	76.2166	29118.4		482	1749	2231	78.3953	24563.8		439	1277	1716	74.4172	26452.8
ccmB	503	480	2613	3093	84.4811	33490.8		547	2483	3030	81.9472	32817.8		480	1938	2418	80.1489	23888.8		572	1506	2078	72.4735	19518.4
ccmB	512	386	2470	2856	86.4846	31812.4		452	2248	2700	83.2593	26500.4		370	1799	2169	82.9414	22898.8		522	1392	1914	72.7273	18483.8
ccmB	514	383	2397	2780	86.223	28676.1		370	2283	2653	86.0535	31873.1		362	1764	2126	82.9727	21081.8		480	1384	1864	74.2489	16943.1
ccmB	551	405	1729	2134	81.0216	20276.8		471	1462	1933	75.6337	16431.1		313	1345	1658	81.1218	18330.4		387	1289	1676	76.9093	17187.4
ccmB	554	364	1706	2070	82.4155	19510.8		573	1294	1867	69.3091	13813.1		323	1293	1616	80.0124	16665.8		432	1164	1596	72.9323	12163.1
ccmB	566	365	1521	1886	80.6469	18219.1		340	1426	1766	80.7475	18418.1		339	1178	1517	77.6533	14284.1		329	1194	1523	78.3979	15820.4
ccmB	569	362	1485	1847	80.4006	17761.4		402	1329	1731	76.7764	15503.8		377	1117	1494	74.7657	13092.4		368	1113	1481	75.1519	12719.1
ccmB	572	402	1412	1814	77.839	15704.1		537	1170	1707	68.5413	12550.4		372	1080	1452	74.3802	12752.1		463	984	1447	68.0028	10768.1
ccmB	583	1196	556	1752	31.7352	4956.44		1314	339	1653	20.5082	2265.44		870	524	1394	37.5897	4578.77		737	649	1386	46.8254	5928.1
ccmB	596	268	1400	1668	83.9329	18369.1		301	1261	1562	80.7298	15658.1		268	1034	1302	79.4163	13394.1		287	1024	1311	78.1083	13071.4
ccmB	611	506	1081	1587	68.1159	12071.4		759	732	1491	49.0946	7579.44		433	804	1237	64.996	8950.1		725	520	1245	41.7671	4753.44
ccmC	103	2668	306	2974	10.2892	1026.44		2700	96	2896	3.31492	1129.08		1107	133	1240	10.7258	1570.77		1051	39	1090	3.71075	2433.01
ccmC	227	5440	611	6051	10.0975	1769.1		3238	91	3329	2.73355	15921.9		4719	536	5255	10.1998	1688.77		3567	69	3636	1.89769	1899.11
ccmC	446	2367	197	2564	7.68331	832.77		2274	21	2295	0.915033	999.324		7855	700	8555	8.18235	599.77		4530	78	4608	1.69271	678.29
ccmFC	38	19	1749	1768	98.9253	25757.8		12	1505	1517	99.209	16417.1		17	2252	2269	99.2508	33586.4		30	1776	1806	98.3389	18247.8
ccmFC	39	1376	720	2096	34.3511	2612.1		1603	212	1815	11.6804	780.77		1791	459	2250	20.4	2953.77		1950	240	2190	10.9589	502.77
ccmFC	50	6	1826	1832	99.6725	25042.4		14	1703	1717	99.1846	22610.4		13	2350	2363	99.4499	33648.8		29	2047	2076	98.6031	28214.1
ccmFC	52	16	1828	1844	99.1323	26930.4		182	1703	1885	90.3448	23364.8		16	2362	2378	99.3272	34988.4		244	2033	2277	89.2841	25812.1
ccmFC	87	1492	520	2012	25.8449	3379.28		1196	816	2012	40.5567	6291.1		1882	711	2593	27.42	4501.77		1535	1056	2591	40.7565	7704.77
ccmFC	103	3	2135	2138	99.8597	32051.8		115	2002	2117	94.5678	27789.1		5	2766	2771	99.8196	38037.1		166	2687	2853	94.1816	31840.1
ccmFC	119	34	1347	1381	97.538	15389.8		32	1240	1272	97.4843	12487.8		60	2039	2099	97.1415	22293.1		44	2271	2315	98.0994	25110.8
ccmFC	122	7	1605	1612	99.5658	29066.8		27	1084	1111	97.5698	15916.4		24	2284	2308	98.9601	31770.1		47	1859	1906	97.5341	26512.1
ccmFC	123	11	1257	1268	99.1325	24216.8		23	1068	1091	97.8918	14153.4		23	1973	1996	98.8477	32237.1		48	1843	1891	97.4617	24398.1
ccmFC	146	169	1306	1475	88.5424	15973.8		219	1341	1560	85.9615	16096.8		246	2230	2476	90.0646	26870.4		583	2455	3038	80.8097	23815.8
ccmFC	160	368	1014	1382	73.3719	13625.1		917	971	1888	51.4301	9146.44		865	2240	3105	72.1417	23259.8		1836	1872	3708	50.4854	15630.8
ccmFC	306	350	3782	4132	91.5295	40376.4		428	3101	3529	87.8719	32572.1		720	6736	7456	90.3433	71211.8		682	5380	6062	88.7496	54724.1
ccmFC	325	624	3696	4320	85.5556	38768.8		40	3698	3738	98.9299	48899.1		1004	6649	7653	86.881	68990.3		114	6119	6233	98.171	74457.1
ccmFC	397	19	4793	4812	99.6052	56665.1		413	4231	4644	91.1068	43432.1		23	8630	8653	99.7342	108771		60	6273	6333	99.0526	63029.4
ccmFC	543	729	4216	4945	85.2578	44732.4		1568	3310	4878	67.8557	32523.4		1116	6801	7917	85.9038	72858.8		2289	4719	7008	67.3373	44997.8
ccmFC	799	14	5083	5097	99.7253	65019.4		154	5235	5389	97.1423	57389.1		13	6171	6184	99.7898	82680.4		180	6443	6623	97.2822	73410.4
ccmFC	866	8	4610	4618	99.8268	65901.4		35	5205	5240	99.3321	61309.1		6	5185	5191	99.8844	78697.8		41	5987	6028	99.3198	75073.4
ccmFC	906	1682	2885	4567	63.1706	28782.1		3005	2098	5103	41.1131	17365.1		1814	3190	5004	63.749	34227.1		3150	2256	5406	41.7314	20210.8
ccmFC	966	44	4690	4734	99.0706	56181.4		2319	2958	5277	56.0546	27199.4		62	5266	5328	98.8363	66207.4		2547	3079	5626	54.728	30539.1
ccmFC	1124	14	3148	3162	99.5572	39889.8		143	3726	3869	96.304	47706.8		2	5771	5773	99.9654	82240.1		223	7365	7588	97.0611	98473.1
ccmFC	1144	120	2412	2532	95.2607	27623.8		449	2825	3274	86.2859	33543.8		210	4519	4729	95.5593	49685.8		899	5343	6242	85.5976	56133.8
ccmFC	1145	29	2481	2510	98.8446	30019.4		1022	2174	3196	68.0225	21128.1		91	4596	4687	98.0585	52600.1		1917	4183	6100	68.5738	38222.1
ccmFC	1219	71	1991	2062	96.5567	21968.1		474	1698	2172	78.1768	16324.8		86	2657	2743	96.8647	29373.8		727	2326	3053	76.1874	21557.8
ccmFC	1244	43	1784	1827	97.6464	21256.4		527	1318	1845	71.4363	13352.1		67	2214	2281	97.0627	25280.8		694	1560	2254	69.2103	14566.1
ccmFC	1300	435	1032	1467	70.3476	11501.8		371	1145	1516	75.5277	2991.44		565	1171	1736	67.4539	12836.4		424	1210	1634	74.0514	3059.44
ccmFN	76	268	2956	3224	91.6873	31622.8		236	2551	2787	91.5321	26828.1		211	2349	2560	91.7578	23496.1		240	2795	3035	92.0923	29604.4
ccmFN	77	1938	1281	3219	39.795	11196.8		1190	1601	2791	57.363	15435.8		1459	1117	2576	43.3618	9543.44		1314	1744	3058	57.0307	17044.8
ccmFN	137	81	2689	2770	97.0758	33518.8		132	2454	2586	94.8956	28933.4		51	2390	2441	97.9107	28053.8		238	3822	4060	94.1379	45236.1
ccmFN	176	171	3435	3606	95.2579	40731.1		236	3299	3535	93.3239	36056.4		216	3206	3422	93.6879	33159.1		387	5666	6053	93.6065	64228.4
ccmFN	181	624	3129	3753	83.3733	34591.1		596	3082	3678	83.7955	32780.1		549	3002	3551	84.5396	29069.4		1031	5346	6377	83.8325	57516.4
ccmFN	190	162	3897	4059	96.0089	53881.1		423	3523	3946	89.2803	38118.8		77	3803	3880	98.0155	54298.4		761	6176	6937	89.0298	68328.8
ccmFN	287	502	6813	7315	93.1374	87885.8		461	6980	7441	93.8046	91171.1		327	6391	6718	95.1325	90995.1		486	6219	6705	92.7517	78601.1
ccmFN	302	801	6534	7335	89.0798	72209.8		842	6895	7737	89.1172	69717.8		530	6442	6972	92.3982	63177.1		729	5606	6335	88.4925	64002.1
ccmFN	318	4007	3377	7384	45.734	33516.8		5996	2046	8042	25.4414	14058.1		3184	4031	7215	55.8697	34930.4		4483	1495	5978	25.0084	12193.1
ccmFN	401	453	5688	6141	92.6234	54872.8		1270	6472	7742	83.596	58063.1		543	6932	7475	92.7358	62853.4		855	4105	4960	82.7621	38801.4
ccmFN	410	645	5185	5830	88.9365	62907.4		1275	6675	7950	83.9623	73576.1		846	6933	7779	89.1246	72048.4		893	4245	5138	82.6197	50620.8
ccmFN	417	176	5665	5841	96.9868	76609.1		268	7716	7984	96.6433	103327		117	7797	7914	98.5216	113694		272	5034	5306	94.8737	69170.1
ccmFN	514	3424	1599	5023	31.8336	15606.8		3076	2780	5856	47.4727	28684.8		4493	2906	7399	39.2756	24059.1		2127	1990	4117	48.3362	22328.4
ccmFN	595	1149	2594	3743	69.3027	31627.4		2681	2467	5148	47.9215	25565.1		1787	4752	6539	72.6717	48681.4		1862	1672	3534	47.3118	18783.8
ccmFN	743	171	4140	4311	96.0334	54822.4		498	4503	5001	90.042	55200.4		151	5959	6110	97.5286	76163.4		374	3398	3772	90.0848	43132.1
ccmFN	752	187	3404	3591	94.7925	44833.4		968	3938	4906	80.2691	46861.4		309	5747	6056	94.8976	70708.8		702	2917	3619	80.6024	36183.1
ccmFN	762	2528	927	3455	26.8307	8859.77		2783	2057	4840	42.5	21693.1		4508	2163	6671	32.4239	18780.8		2039	1503	3542	42.4337	16805.4
ccmFN	790	118	3302	3420	96.5497	44379.4		243	4430	4673	94.7999	56834.1		101	5706	5807	98.2607	73420.1		197	3263	3460	94.3064	42605.4
ccmFN	812	107	3395	3502	96.9446	48835.8		249	4780	5029	95.0487	68235.8		106	5884	5990	98.2304	86450.1		191	3367	3558	94.6318	47137.4
ccmFN	824	216	3355	3571	93.9513	43852.8		485	4711	5196	90.6659	58249.1		242	5744	5986	95.9572	69276.8		337	3279	3616	90.6803	42119.8
ccmFN	839	169	3508	3677	95.4039	46332.4		663	4892	5555	88.0648	58570.8		252	6101	6353	96.0334	74753.8		409	3379	3788	89.2027	42891.8
ccmFN	988	527	4702	5229	89.9216	58481.1		1324	6892	8216	83.8851	76190.4		651	8460	9111	92.8548	91343.8		914	4892	5806	84.2577	59348.8
ccmFN	1214	4533	1273	5806	21.9256	10454.4		3337	2003	5340	37.5094	20268.8		7324	2006	9330	21.5005	12373.8		3314	1950	5264	37.0441	20385.4
ccmFN	1325	152	3379	3531	95.6953	43776.4		374	4282	4656	91.9674	57063.8		255	5724	5979	95.7351	65138.1		352	3832	4184	91.587	49324.1
ccmFN	1342	262	3109	3371	92.2278	39648.4		1439	3168	4607	68.7649	36441.4		439	5152	5591	92.1481	57148.4		1099	2662	3761	70.779	32338.4
ccmFN	1357	147	3187	3334	95.5909	44663.8		458	4152	4610	90.0651	53726.1		272	5194	5466	95.0238	70719.1		359	3419	3778	90.4976	44411.8
ccmFN	1375	152	3124	3276	95.3602	41673.8		476	4038	4514	89.455	48774.4		215	5054	5269	95.9195	71307.8		398	3357	3755	89.4008	42047.4
ccmFN	1408	91	3212	3303	97.2449	43713.4		286	4311	4597	93.7786	53193.8		127	4925	5052	97.4861	61684.4		244	3603	3847	93.6574	46227.8
ccmFN	1419	3014	274	3288	8.33333	342.103		3745	445	4190	10.6205	1446.1		4582	454	5036	9.01509	299.103		3463	394	3857	10.2152	1402.1
ccmFN	1469	176	3839	4015	95.6164	50473.1		355	4215	4570	92.2319	54588.8		155	4859	5014	96.9087	62359.8		412	5160	5572	92.6059	65220.8
ccmFN	1474	1972	170	2142	7.93651	193.77		2037	189	2226	8.49057	364.77		2906	355	3261	10.8862	1573.44		1524	135	1659	8.13743	138.27
ccmFN	1489	201	3227	3428	94.1365	42883.8		625	3401	4026	84.4759	42189.4		241	4672	4913	95.0946	61324.1		624	3266	3890	83.9589	40741.4
ccmFN	1492	2434	871	3305	26.354	8085.44		3264	675	3939	17.1363	4529.1		2707	2144	4851	44.1971	20893.1		3059	636	3695	17.2124	4590.1
ccmFN	1493	509	2798	3307	84.6084	35931.4		1369	2568	3937	65.2273	30409.4		850	4005	4855	82.4923	45594.1		1247	2364	3611	65.4666	28707.4
ccmFN	1505	367	2976	3343	89.0218	38834.1		850	2948	3798	77.6198	35480.1		578	4547	5125	88.722	52903.1		740	2520	3260	77.3006	31206.8
ccmFN	1540	70	3332	3402	97.9424	47127.4		166	3638	3804	95.6362	50335.8		63	5209	5272	98.805	75476.8		177	3069	3246	94.5471	41220.8
ccmFN	1553	508	6268	6776	92.503	75296.1		625	3168	3793	83.5223	37931.8		814	7773	8587	90.5206	78968.1		573	2671	3244	82.3366	33005.1
ccmFN	1588	344	4560	4904	92.9853	55948.8		490	3461	3951	87.5981	40685.1		652	7673	8325	92.1682	80081.1		474	2900	3374	85.9514	35933.8
ccmFN	1709	5352	617	5969	10.3367	1392.1		7087	989	8076	12.2462	2078.77		5409	957	6366	15.033	3347.44		3730	544	4274	12.7281	2489.44
ccmFN	1918	96	2658	2754	96.5142	33681.4		150	2389	2539	94.0922	29097.8		65	2062	2127	96.9441	25430.1		159	2627	2786	94.2929	31117.8
cob	286	252	7646	7898	96.8093	91375.1		715	7081	7796	90.8286	81473.4		300	4576	4876	93.8474	57185.8		517	6377	6894	92.5007	71296.4
cob	298	322	7681	8003	95.9765	88028.4		701	6951	7652	90.839	73527.1		257	4726	4983	94.8425	59408.8		414	6169	6583	93.7111	69672.1
cob	325	213	8441	8654	97.5387	103180		500	7900	8400	94.0476	94194.4		218	5077	5295	95.8829	66418.8		223	6298	6521	96.5803	75519.1
cob	419	301	8226	8527	96.47	100183		645	6731	7376	91.2554	79905.4		312	5900	6212	94.9775	75135.8		547	5826	6373	91.4169	66744.4
cob	564	968	5527	6495	85.0962	66461.4		1744	3913	5657	69.1709	43833.8		411	3792	4203	90.2213	45911.1		1931	5743	7674	74.8371	63639.4
cob	568	223	6107	6330	96.4771	84379.8		508	5028	5536	90.8237	62738.1		213	3652	3865	94.489	45268.4		418	6385	6803	93.8557	79218.8
cob	580	273	6337	6610	95.8699	78780.1		399	5009	5408	92.622	60739.1		185	3604	3789	95.1174	47311.8		419	6235	6654	93.703	69550.8
cob	680	115	6744	6859	98.3234	86215.1		337	4180	4517	92.5393	44991.1		225	4454	4679	95.1913	56171.4		292	4903	5195	94.3792	48834.8
cob	715	103	5623	5726	98.2012	78826.4		181	3394	3575	94.9371	47140.8		141	3399	3540	96.0169	43898.4		167	4480	4647	96.4063	62592.1
cob	725	223	5193	5416	95.8826	66515.8		262	3259	3521	92.5589	40939.8		166	3390	3556	95.3318	43338.2		254	4157	4411	94.2417	48534.4
cob	808	154	5689	5843	97.3644	69222.4		205	4583	4788	95.7185	52119.4		135	3325	3460	96.0983	42654.1		202	5191	5393	96.2544	60285.1
cob	853	223	4769	4992	95.5329	59328.8		416	4086	4502	90.7597	47354.1		161	3362	3523	95.43	43274.4		440	5206	5646	92.2069	57545.1
cob	908	149	4289	4438	96.6426	53912.1		684	7535	8219	91.6778	81045.1		1230	4777	6007	79.5239	59702.4		449	7518	7967	94.3643	79275.4
cob	982	148	3340	3488	95.7569	40324.4		525	4861	5386	90.2525	48181.8		259	3543	3802	93.1878	41299.1		559	5154	5713	90.2153	49073.4
cob	1098	1235	1659	2894	57.3255	14398.8		800	2537	3337	76.0264	26629.1		1541	2586	4127	62.6605	24268.8		590	2278	2868	79.4282	21463.4
cob	1124	249	2142	2391	89.5859	23797.3		196	2593	2789	92.9724	29166.1		298	2725	3023	90.1422	28865.1		179	2006	2185	91.8078	20912.1
cob	1171	171	1783	1954	91.2487	21257.8		146	2210	2356	93.8031	26721.4		208	2103	2311	90.9996	23932.8		131	1572	1703	92.3077	17999.8
cox1	15	457	1374	1831	75.041	15768.1		258	1312	1570	83.5669	14178.8		412	1474	1886	78.1548	16176.4		276	1351	1627	83.0363	14377.1
cox1	1402	190	5235	5425	96.4977	59497.8		154	4015	4169	96.3061	43766.8		334	8221	8555	96.0959	88244.8		240	6295	6535	96.3275	66374.8
cox1	1405	52	5214	5266	99.0125	61294.8		54	4005	4059	98.6696	45055.1		175	8196	8371	97.9094	90725.4		112	6258	6370	98.2418	71184.4
cox1	1433	71	4047	4118	98.2759	48175.4		85	2966	3051	97.214	33732.8		273	6297	6570	95.8447	69108.4		108	4829	4937	97.8124	45396.1
cox1	1489	171	1968	2139	92.0056	22639.1		99	1608	1707	94.2004	18292.8		418	3135	3553	88.2353	32794.4		142	2738	2880	95.0694	20514.8
cox2	14	43	1442	1485	97.1044	28801.8		181	1904	2085	91.3189	22185.8		19	1799	1818	98.9549	23962.1		51	1721	1772	97.1219	21809.4
cox2	30	1394	159	1553	10.2382	572.77		1897	284	2181	13.0215	1395.1		1332	560	1892	29.5983	4541.77		1644	247	1891	13.0619	807.437
cox2	31	816	737	1553	47.4565	11424.8		1263	916	2179	42.0376	8977.77		882	1026	1908	53.7736	10120.4		1017	877	1894	46.3041	7808.1
cox2	77	71	2307	2378	97.0143	26519.4		134	2411	2545	94.7348	27380.8		130	2153	2283	94.3057	22357.4		257	2049	2306	88.8552	19262.8
cox2	144	787	2343	3130	74.8562	25448.8		575	1984	2559	77.5303	21370.1		411	1956	2367	82.6362	20844.1		567	2085	2652	78.6199	15099.4
cox2	162	2947	1001	3948	25.3546	7582.44		1916	1268	3184	39.8241	7495.77		2079	857	2936	29.1894	6307.77		1346	1825	3171	57.5528	16341.8
cox2	167	6	4239	4245	99.8587	65209.4		19	3421	3440	99.4477	46710.4		15	3159	3174	99.5274	47492.8		41	3360	3401	98.7945	45497.8
cox2	169	57	4332	4389	98.7013	55838.4		21	3553	3574	99.4124	48070.8		19	3262	3281	99.4209	46906.1		12	3520	3532	99.6602	50665.1
cox2	259	42	8659	8701	99.5173	100184		25	7574	7599	99.671	102524		30	6695	6725	99.5539	81590.8		30	7062	7092	99.577	85019.4
cox2	284	444	9449	9893	95.512	103905		40	8705	8745	99.5426	114345		181	7515	7696	97.6481	80394.1		399	7833	8232	95.1531	80172.1
cox2	385	153	10160	10313	98.5164	119104		289	10040	10329	97.2021	111794		80	8705	8785	99.0894	95989.8		271	9454	9725	97.2134	99038.1
cox2	449	7	8656	8663	99.9192	130889		11	9102	9113	99.8793	128297		10	8144	8154	99.8774	116254		39	8374	8413	99.5364	114921
cox2	466	84	8078	8162	98.9708	94442.1		100	8749	8849	98.8699	104476		130	7858	7988	98.3726	102058		197	7932	8129	97.5766	94237.8
cox2	467	56	8159	8215	99.3183	119763		69	8834	8903	99.225	127488		147	7889	8036	98.1707	105122		196	7965	8161	97.5983	96393.7
cox2	482	1144	6769	7913	85.5428	73065.1		1855	6807	8662	78.5846	67874.4		2221	5688	7909	71.9181	53770.8		3116	5067	8183	61.9211	44271.4
cox2	550	15	7384	7399	99.7973	108361		20	7249	7269	99.7249	98446.4		21	6873	6894	99.6954	99568.1		75	7549	7624	99.0163	82642.4
cox2	563	145	6645	6790	97.8645	74206.8		104	6624	6728	98.4542	74858.8		119	6199	6318	98.1165	66296.1		364	6806	7170	94.9233	65707.1
cox2	587	33	5698	5731	99.4242	80319.8		62	5490	5552	98.8833	63447.1		34	5301	5335	99.3627	72905.1		238	5927	6165	96.1395	58180.8
cox2	620	1362	2790	4152	67.1965	28210.4		503	3308	3811	86.8014	34717.4		653	3115	3768	82.6699	31020.1		1207	3340	4547	73.455	30059.8
cox2	638	2161	1248	3409	36.609	11012.4		1679	1343	3022	44.4408	12329.4		1266	1751	3017	58.0378	16624.8		2031	1700	3731	45.5642	13759.4
cox2	704	82	3073	3155	97.401	34584.4		326	2504	2830	88.4806	26336.1		13	2339	2352	99.4473	26766.1		178	2225	2403	92.5926	22040.1
cox3	69	2367	1533	3900	39.3077	13223.8		4635	844	5479	15.4043	3414.44		2951	2790	5741	48.5978	23860.8		4008	1170	5178	22.5956	6248.77
cox3	245	1826	4454	6280	70.9236	44864.8		3910	1273	5183	24.5611	9544.1		1480	3481	4961	70.1673	38313.4		4857	1569	6426	24.4164	10937.8
cox3	257	1991	4432	6423	69.002	42568.4		4005	1295	5300	24.434	9675.1		1480	3529	5009	70.4532	38785.4		4640	1716	6356	26.9981	12542.1
cox3	289	1785	4958	6743	73.5281	49561.4		2961	2513	5474	45.9079	24905.4		1250	3715	4965	74.8238	40746.4		2380	3730	6110	61.0475	35955.1
cox3	311	2447	3976	6423	61.9025	35300.4		3765	1676	5441	30.8032	13245.8		1627	2927	4554	64.2732	27663.4		3649	2002	5651	35.4274	15831.1
cox3	314	1958	4577	6535	70.0383	46760.1		3378	2102	5480	38.3577	22170.4		1267	3322	4589	72.3905	39179.8		2568	3064	5632	54.4034	29518.8
cox3	413	1641	5993	7634	78.5041	61442.8		3779	2998	6777	44.2379	27375.8		1227	4232	5459	77.5234	46342.4		3637	2967	6604	44.9273	25968.1
cox3	422	1974	5733	7707	74.3869	58120.1		4240	2596	6836	37.9754	22514.8		1485	4177	5662	73.7725	44799.1		4244	2581	6825	37.8168	20954.4
cox3	527	1469	6012	7481	80.3636	59970.8		4517	4123	8640	47.7199	34717.4		2089	7648	9737	78.5458	72729.1		4279	4685	8964	52.2646	36835.4
cox3	566	1570	4720	6290	75.0397	48572.8		3970	3337	7307	45.6685	28538.4		2244	6217	8461	73.4783	59665.8		4428	3891	8319	46.7724	30784.1
cox3	754	590	2025	2615	77.4379	20614.4		1407	1880	3287	57.195	18541.1		739	2778	3517	78.9878	28508.1		1158	1839	2997	61.3614	17591.1
cox3	764	574	1922	2496	77.0032	21580.4		1613	1493	3106	48.0683	15137.4		744	2594	3338	77.7112	27784.8		1345	1452	2797	51.9128	13647.8
matR	17	680	811	1491	54.393	8745.77		977	696	1673	41.6019	7194.1		653	943	1596	59.0852	9923.1		874	770	1644	46.837	7630.1
matR	86	387	1888	2275	82.989	19922.8		338	2414	2752	87.718	28774.4		485	2120	2605	81.382	24034.1		218	2988	3206	93.2002	32732.4
matR	92	1087	1318	2405	54.8025	12137.8		1476	1464	2940	49.7959	13735.4		1526	1255	2781	45.1277	10333.1		1729	1713	3442	49.7676	14248.4
matR	295	4484	3091	7575	40.8053	26458.1		5924	2240	8164	27.4375	18897.4		3967	4737	8704	54.4233	44981.1		5007	3260	8267	39.4339	30568.1
matR	296	1902	6066	7968	76.1295	61791.4		3977	4265	8242	51.7471	43328.8		1287	7508	8795	85.3667	77089.1		2645	5662	8307	68.1594	58067.8
matR	1124	790	7954	8744	90.9652	86848.4		676	5412	6088	88.8962	63675.1		538	3679	4217	87.2421	60861.8		515	6322	6837	92.4675	74455.4
matR	1730	2099	5349	7448	71.8179	51886.8		3085	3095	6180	50.0809	31370.8		2429	6615	9044	73.1424	64081.4		1487	2307	3794	60.8065	36093.4
matR	1751	1093	6043	7136	84.6833	62207.8		1035	4386	5421	80.9076	50291.8		1048	7729	8777	88.0597	77948.4		761	4571	5332	85.7277	52985.4
matR	1785	4559	1517	6076	24.9671	10273.1		3396	998	4394	22.7128	8551.1		4495	3059	7554	40.4951	25370.4		2608	1724	4332	39.7969	17464.8
matR	1877	245	2924	3169	92.2689	33312.5		208	2427	2635	92.1063	33302.3		185	4393	4578	95.9589	61474.4		130	2811	2941	95.5797	37465.1
matR	1885	297	2617	2914	89.8078	28739.1		293	2198	2491	88.2377	26303.8		436	3671	4107	89.384	40395.1		475	2289	2764	82.8148	24806.1
matR	1895	323	2138	2461	86.8753	23755.4		445	1266	1711	73.9918	21026.1		192	3365	3557	94.6022	37900.4		389	2213	2602	85.05	24242.1
matR	1905	1460	622	2082	29.8751	5156.44		1594	528	2122	24.8822	4256.1		1871	1212	3083	39.3124	10259.1		1633	798	2431	32.826	6911.1
mttb	127	2193	706	2899	24.3532	4117.1		2174	677	2851	23.7461	4028.1		2670	714	3384	21.0993	4337.77		3109	846	3955	21.3906	5100.77
mttb	205	1205	100	1305	7.66284	94.77		—	—	—	—	—		4148	416	4564	9.11481	1172.44		3646	357	4003	8.91831	724.77
mttb	215	2596	283	2879	9.8298	1113.77		—	—	—	—	—		4438	510	4948	10.3072	2284.77		4004	399	4403	9.062	580.27
mttb	373	5477	756	6233	12.129	1926.1		4715	1345	6060	22.1947	8453.77		5491	1161	6652	17.4534	6433.1		4296	1052	5348	19.6709	7205.44
mttb	532	3672	3161	6833	46.2608	28143.1		4318	2398	6716	35.7058	22252.1		4122	4036	8158	49.4729	35361.8		4477	2298	6775	33.9188	19799.1
nad1	2	43	1801	1844	97.6681	23759.1		200	1607	1807	88.9319	19316.4		41	1826	1867	97.804	23607.4		152	1583	1735	91.2392	17655.4
nad1	138	2638	343	2981	11.5062	742.437		2472	328	2800	11.7143	747.437		2909	478	3387	14.1128	2270.1		3298	595	3893	15.2838	2161.44
nad1	215	88	7743	7831	98.8763	92007.4		16	7763	7779	99.7943	91220.1		71	9034	9105	99.2202	112794		186	9170	9356	98.012	97893.8
nad1	307	118	8895	9013	98.6908	103697		123	9392	9515	98.7073	109820		234	8049	8283	97.1749	100697		158	8990	9148	98.2728	103854
nad1	308	40	8967	9007	99.5559	109956		38	9495	9533	99.6014	123856		56	8166	8222	99.3189	116649		7	9091	9098	99.9231	136076
nad1	490	6	4539	4545	99.868	66098.4		14	5475	5489	99.7449	76112.8		13	3825	3838	99.6613	54350.4		0	4244	4244	100	63647.8
nad1	492	85	4325	4410	98.0726	57674.4		1	5386	5387	99.9814	83208.4		5	3662	3667	99.8636	56020.4		24	4069	4093	99.4136	55349.4
nad1	500	11	4297	4308	99.7447	61120.4		23	5123	5146	99.5531	70258.8		0	3624	3624	100	55649.4		6	4014	4020	99.8507	59644.4
nad1	536	5	4411	4416	99.8868	64920.4		19	5228	5247	99.6379	72277.8		27	3560	3587	99.2473	49722.1		4	4002	4006	99.9001	57765.8
nad1	537	2218	2150	4368	49.2216	24402.4		1060	4165	5225	79.7129	50209.1		1799	1760	3559	49.4521	20287.1		587	3369	3956	85.1618	41371.1
nad1	555	647	3753	4400	85.2955	46138.1		359	4883	5242	93.1515	60209.1		323	3258	3581	90.9802	41323.3		100	3907	4007	97.5044	50875.8
nad1	571	165	4159	4324	96.1841	54158.4		117	4975	5092	97.7023	65169.4		122	3448	3570	96.5826	46695.1		20	3882	3902	99.4874	52984.1
nad1	577	81	4177	4258	98.0977	55842.1		39	4756	4795	99.1867	66449.8		11	3565	3576	99.6924	53054.4		23	3777	3800	99.3947	51521.8
nad1	580	0	4240	4240	100	65027.1		30	4785	4815	99.3769	67279.1		15	3537	3552	99.5777	50073.4		18	3775	3793	99.5254	51449.7
nad1	608	5	4259	4264	99.8827	63840.1		9	4853	4862	99.8149	68121.1		0	3625	3625	100	55548.8		11	3813	3824	99.7123	53560.8
nad1	635	3	6414	6417	99.9532	98041.1		50	8423	8473	99.4099	112642		0	6158	6158	100	95130.4		20	5031	5051	99.604	67080.4
nad1	674	1	4546	4547	99.978	72338.4		0	6315	6315	100	98543.1		5	3879	3884	99.8713	59997.4		2	4262	4264	99.9531	66800.4
nad1	679	2915	703	3618	19.4306	2332.06		3877	1089	4966	21.9291	4202.73		2501	703	3204	21.9413	2807.73		2921	740	3661	20.2131	2720.06
nad1	734	7	5088	5095	99.8626	74754.8		0	4139	4139	100	63460.1		8	4621	4629	99.8272	67803.1		10	7358	7368	99.8643	109609
nad1	743	0	4916	4916	100	75402.1		0	4009	4009	100	61728.1		10	4448	4458	99.7757	65525.8		31	7141	7172	99.5678	80895.4
nad1	755	25	4747	4772	99.4761	60790.8		0	3841	3841	100	58513.4		0	4179	4179	100	64546.8		12	6987	6999	99.8285	106053
nad1	779	674	3631	4305	84.3438	39745.1		427	3029	3456	87.6447	34409.8		235	3362	3597	93.4668	41276.8		404	5753	6157	93.4384	58811.8
nad1	823	765	2187	2952	74.0854	19134.8		353	2093	2446	85.5683	20769.8		367	2656	3023	87.8597	24137.4		461	3517	3978	88.4113	30612.1
nad1	835	2487	260	2747	9.46487	224.09		2000	348	2348	14.8211	1623.1		2500	402	2902	13.8525	1699.44		2872	829	3701	22.3994	4768.44
nad1	898	1	3328	3329	99.97	48318.4		9	2992	3001	99.7001	41121.8		17	3481	3498	99.514	43144.1		30	2881	2911	98.9694	35957.1
nad1	928	112	2702	2814	96.0199	32253.1		88	2498	2586	96.5971	31928.4		63	2695	2758	97.7157	34060.4		49	2166	2215	97.7878	28111.4
nad1	937	438	2231	2669	83.5894	24405.8		822	1613	2435	66.2423	16669.1		766	1815	2581	70.3216	18698.1		589	1504	2093	71.8586	15178.4
nad1	953	21	2531	2552	99.1771	35775.1		63	2267	2330	97.2961	32627.8		3	2257	2260	99.8673	34348.8		16	1936	1952	99.1803	27833.4
nad2	-8	976	88	1064	8.27068	93.27		1181	133	1314	10.1218	444.27		1033	113	1146	9.86038	378.77		—	—	—	—	—
nad2	26	16	1801	1817	99.1194	22854.4		27	2194	2221	98.7843	26728.1		4	1975	1979	99.7979	24572.8		11	1485	1496	99.2647	17795.1
nad2	303	5117	1605	6722	23.8768	13376.4		3456	1762	5218	33.7677	16153.1		4867	1195	6062	19.713	8393.44		3439	2703	6142	44.0085	20833.1
nad2	308	92	6917	7009	98.6874	88326.4		1	5298	5299	99.9811	77958.8		11	5966	5977	99.816	83210.4		22	6040	6062	99.6371	75394.1
nad2	356	1812	5761	7573	76.0729	62623.1		443	5548	5991	92.6056	68249.1		1625	5364	6989	76.7492	63164.4		872	5591	6463	86.5078	53693.8
nad2	361	11	7775	7786	99.8587	109040		19	6086	6105	99.6888	88004.8		8	6593	6601	99.8788	98456.8		0	6588	6588	100	102018
nad2	367	50	7819	7869	99.3646	106999		27	6152	6179	99.563	87498.8		61	6579	6640	99.0813	95460.8		9	6654	6663	99.8649	93411.8
nad2	388	0	8295	8295	100	127303		7	6410	6417	99.8909	95833.4		0	6814	6814	100	105531		0	6928	6928	100	106232
nad2	394	2	8514	8516	99.9765	126892		2	6678	6680	99.9701	101583		1	7049	7050	99.9858	105518		2	7074	7076	99.9717	105297
nad2	453	3578	352	3930	8.95674	127.77		2095	233	2328	10.0086	39730.3		5509	2423	7932	30.5472	5375.44		3829	1223	5052	24.2082	8403.77
nad2	497	3	5927	5930	99.9494	87313.1		3	5701	5704	99.9474	76961.1		12	3582	3594	99.6661	51757.1		2	5267	5269	99.962	75802.8
nad2	523	4	6017	6021	99.9336	89257.1		22	4930	4952	99.5557	47097.8		4	3548	3552	99.8874	52848.4		14	5625	5639	99.7517	73561.1
nad2	621	13	5945	5958	99.7818	82725.8		1	4218	4219	99.9763	62946.1		1	3505	3506	99.9715	53421.4		2	6010	6012	99.9667	86096.8
nad2	677	49	5723	5772	99.1511	73704.4		7	4172	4179	99.8325	60175.1		9	3557	3566	99.7476	49740.4		8	5892	5900	99.8644	77687.4
nad2	788	27	7366	7393	99.6348	95209.4		0	6224	6224	100	92485.4		44	5771	5815	99.2433	65687.8		11	7475	7486	99.8531	103680
nad2	800	2	7438	7440	99.9731	114833		8	5758	5766	99.8613	85576.8		7	5478	5485	99.8724	77478.8		10	7609	7619	99.8687	103287
nad2	809	15	7340	7355	99.7961	102098		1	5821	5822	99.9828	88221.8		11	5454	5465	99.7987	77218.4		27	7570	7597	99.6446	95899.4
nad2	920	4	6062	6066	99.9341	88746.4		19	5079	5098	99.6273	69517.4		6	4638	4644	99.8708	65297.4		18	5478	5496	99.6725	72429.8
nad2	928	12	5514	5526	99.7828	76684.4		0	4435	4435	100	69881.1		7	3879	3886	99.8199	58457.1		0	5186	5186	100	80430.1
nad2	958	14	5081	5095	99.7252	71720.1		6	3990	3996	99.8498	59085.8		10	3617	3627	99.7243	52267.4		0	5118	5118	100	78794.4
nad2	962	701	4357	5058	86.1408	52902.8		5	3982	3987	99.8746	59378.4		180	3436	3616	95.0221	45480.4		170	4908	5078	96.6522	60874.8
nad2	1028	0	4940	4940	100	77200.4		3	3891	3894	99.923	60501.1		4	3614	3618	99.8894	53370.8		6	5417	5423	99.8894	80090.1
nad2	1058	0	5252	5252	100	76614.1		6	4237	4243	99.8586	61092.1		2	3696	3698	99.9459	54964.8		6	6014	6020	99.9003	84051.1
nad2	1246	9	7289	7298	99.8767	101071		0	8477	8477	100	127115		9	7424	7433	99.8789	105375		18	8231	8249	99.7818	113124
nad2	1247	56	7149	7205	99.2228	83561.1		0	8378	8378	100	127355		11	7331	7342	99.8502	105176		0	8150	8150	100	124129
nad2	1276	34	5472	5506	99.3825	69312.1		0	6711	6711	100	102778		25	5700	5725	99.5633	73398.4		0	6503	6503	100	99369.4
nad2	1298	0	4413	4413	100	67699.4		23	5222	5245	99.5615	68790.4		9	4509	4518	99.8008	65384.8		3	5068	5071	99.9408	77552.1
nad2	1400	13	2838	2851	99.544	37968.4		35	3145	3180	98.8994	44349.8		8	2830	2838	99.7181	35311.1		13	2054	2067	99.3711	29619.8
nad2	1403	38	2636	2674	98.5789	32366.4		49	2976	3025	98.3802	39404.4		11	2534	2545	99.5678	33980.4		21	1773	1794	98.8294	21767.4
nad2	1408	42	2532	2574	98.3683	30118.4		160	2760	2920	94.5205	31199.1		60	2372	2432	97.5329	27612.8		106	1597	1703	93.7757	16714.1
nad2	1409	201	2342	2543	92.0959	26549.5		1207	1666	2873	57.9882	16292.4		276	2121	2397	88.4856	23052.1		542	1126	1668	67.506	10715.1
nad2	1416	34	2422	2456	98.6156	29475.8		124	2662	2786	95.5492	30554.8		10	2217	2227	99.551	29582.8		21	1568	1589	98.6784	22037.8
nad2	1457	3	2046	2049	99.8536	29630.1		3	2237	2240	99.8661	31958.4		5	1706	1711	99.7078	24354.4		0	1109	1109	100	16504.4
nad3	5	1016	503	1519	33.1139	4217.1		347	48	395	12.1519	337.77		633	919	1552	59.2139	9139.44		910	296	1206	24.5439	1901.1
nad3	39	1570	274	1844	14.859	1142.77		802	113	915	12.3497	549.77		1465	397	1862	21.3212	2909.1		1227	248	1475	16.8136	1493.77
nad3	44	754	1193	1947	61.2738	14535.1		984	425	1409	30.1632	4301.1		1091	859	1950	44.0513	10253.1		1204	342	1546	22.1216	3267.1
nad3	61	1028	1213	2241	54.1276	15017.1		1139	406	1545	26.2783	3824.44		1241	995	2236	44.4991	12397.1		1375	357	1732	20.612	3256.1
nad3	62	1243	1021	2264	45.0972	9800.77		1283	278	1561	17.8091	1833.44		1310	945	2255	41.9069	10627.8		1456	311	1767	17.6005	2309.1
nad3	80	1287	1441	2728	52.8226	12027.4		1196	512	1708	29.9766	3586.1		1113	1515	2628	57.6484	14515.4		1207	800	2007	39.8605	6292.1
nad3	137	553	2290	2843	80.5487	28475.1		822	715	1537	46.5192	7268.44		733	2389	3122	76.5215	30714.8		965	1445	2410	59.9585	15784.4
nad3	138	840	98	938	10.4478	186.77		—	—	—	—	—		2636	495	3131	15.8096	1822.44		1506	213	1719	12.3909	591.77
nad3	146	1323	1627	2950	55.1525	15094.1		1217	386	1603	24.0799	2513.44		1268	2013	3281	61.3532	19782.4		1811	726	2537	28.6165	4973.77
nad3	185	717	2412	3129	77.0853	30928.8		652	997	1649	60.4609	11586.8		947	2366	3313	71.4156	29904.4		750	2032	2782	73.041	23091.1
nad3	190	1004	2048	3052	67.1035	25354.4		1108	542	1650	32.8485	5503.44		1080	2205	3285	67.1233	27863.8		1546	1190	2736	43.4942	12014.4
nad3	208	1505	1401	2906	48.2106	16498.8		1221	352	1573	22.3776	3242.77		1461	1716	3177	54.0132	20911.4		1948	675	2623	25.7339	6790.77
nad3	209	1174	1654	2828	58.4866	21124.8		1052	513	1565	32.7796	5502.44		1267	1870	3137	59.6111	24462.4		1615	971	2586	37.5483	10550.4
nad3	215	1687	1081	2768	39.0535	12038.1		1225	301	1526	19.7248	2580.77		1692	1352	3044	44.4152	15711.1		1934	580	2514	23.0708	5479.1
nad3	230	1813	749	2562	29.235	7013.1		1252	206	1458	14.1289	1217.44		1700	1059	2759	38.3835	10490.4		1916	422	2338	18.0496	3525.1
nad3	247	1746	1287	3033	42.4332	15224.8		1369	231	1600	14.4375	1610.77		1683	1324	3007	44.0306	16786.8		1884	523	2407	21.7283	4902.44
nad3	251	2701	908	3609	25.1593	6810.44		1200	147	1347	10.9131	454.27		2388	1165	3553	32.7892	10365.4		2428	441	2869	15.3712	1976.1
nad3	275	3066	410	3476	11.7952	346.437		—	—	—	—	—		2676	602	3278	18.3649	2267.1		——	——	——	——	——
nad3	317	969	1939	2908	66.6781	17443.1		1197	499	1696	29.4222	3017.1		1027	1623	2650	61.2453	13689.8		1518	520	2038	25.5152	2683.1
nad3	344	1078	1323	2401	55.102	15343.4		1087	428	1515	28.2508	3027.44		989	1309	2298	56.9626	15720.1		1175	593	1768	33.5407	5227.77
nad3	349	1175	1188	2363	50.2751	12500.8		1020	465	1485	31.3131	3755.1		1145	1107	2252	49.1563	9815.44		1212	516	1728	29.8611	4339.44
nad4	-7	1145	347	1492	23.2574	2619.44		1059	187	1246	15.008	1473.77		1292	414	1706	24.2673	3209.77		1529	267	1796	14.8664	1453.44
nad4	44	18	1928	1946	99.075	25103.4		53	2289	2342	97.737	28647.8		14	2231	2245	99.3764	30240.4		28	2470	2498	98.8791	31371.4
nad4	74	9	2374	2383	99.6223	30157.1		33	2835	2868	98.8494	35916.8		20	2680	2700	99.2593	35092.1		38	3154	3192	98.8095	40351.8
nad4	77	5	2429	2434	99.7946	35182.4		10	2945	2955	99.6616	40743.1		13	2740	2753	99.5278	36813.7		0	3271	3271	100	50311.4
nad4	84	1886	647	2533	25.5428	4197.77		2708	434	3142	13.8129	1424.44		2211	667	2878	23.1758	3871.77		2957	481	3438	13.9907	1454.1
nad4	107	4	2192	2196	99.8179	32658.4		6	2860	2866	99.7906	41702.4		3	2527	2530	99.8814	36310.8		5	3612	3617	99.8618	53955.8
nad4	154	257	3290	3547	92.7544	36318.8		728	4078	4806	84.8523	44375.1		284	3891	4175	93.1976	43369.8		886	5253	6139	85.5677	59164.1
nad4	156	2143	1432	3575	40.0559	12949.1		3700	1181	4881	24.1959	8730.77		2569	1658	4227	39.224	14515.1		4616	1558	6174	25.2349	12114.1
nad4	158	4	3700	3704	99.892	55637.8		12	5057	5069	99.7633	70713.4		16	4342	4358	99.6329	60184.8		9	6394	6403	99.8594	95196.1
nad4	164	342	3575	3917	91.2688	38158.1		569	4292	4861	88.2946	44551.1		433	4155	4588	90.5623	43794.1		677	5410	6087	88.8779	56922.4
nad4	166	0	3991	3991	100	62029.8		1	5531	5532	99.9819	86210.1		3	4659	4662	99.9356	68788.8		1	6885	6886	99.9855	108066
nad4	197	10	5245	5255	99.8097	72307.8		13	7336	7349	99.8231	102040		6	6118	6124	99.902	84098.8		14	9249	9263	99.8489	127941
nad4	317	2	7230	7232	99.9723	102680		4	5964	5968	99.933	86198.8		1	7043	7044	99.9858	99372.8		2	5670	5672	99.9647	81667.4
nad4	362	8	7052	7060	99.8867	100542		0	5888	5888	100	90506.8		9	6767	6776	99.8672	97790.4		13	4900	4913	99.7354	69437.1
nad4	376	0	6990	6990	100	107689		4	5950	5954	99.9328	87306.4		0	6872	6872	100	105421		0	4822	4822	100	73983.1
nad4	401	18	7023	7041	99.7444	92582.8		6	6160	6166	99.9027	90202.4		0	7014	7014	100	107666		11	4773	4784	99.7701	70438.4
nad4	416	22	7077	7099	99.6901	93036.1		22	6148	6170	99.6434	85209.1		22	6947	6969	99.6843	91799.4		8	4759	4767	99.8322	70623.4
nad4	433	115	6789	6904	98.3343	73478.8		190	5721	5911	96.7857	60192.8		115	6578	6693	98.2818	68358.4		140	4295	4435	96.8433	46318.8
nad4	437	0	6984	6984	100	107942		33	5952	5985	99.4486	80860.8		0	6896	6896	100	106919		10	4532	4542	99.7798	68025.1
nad4	449	9	7056	7065	99.8726	98173.1		13	6393	6406	99.7971	91069.8		24	7111	7135	99.6636	92186.4		28	4815	4843	99.4218	64569.1
nad4	819	2953	4978	7931	62.7664	50953.4		258	6406	6664	96.1285	82382.4		2836	4861	7697	63.1545	50693.1		192	5410	5602	96.5727	70728.4
nad4	977	146	8620	8766	98.3345	97279.4		166	6819	6985	97.6235	88399.4		173	9080	9253	98.1303	101695		130	5168	5298	97.5462	68676.4
nad4	1373	4	2012	2016	99.8016	26403.8		14	3016	3030	99.538	37363.8		20	2404	2424	99.1749	30573.1		13	4695	4708	99.7239	59399.8
nad4	1405	33	2481	2514	98.6874	36348.1		5	3456	3461	99.8555	49010.4		30	2694	2724	98.8987	34453.4		15	4080	4095	99.6337	48527.4
nad4	1417	34	2299	2333	98.5426	34115.1		28	3214	3242	99.1363	41896.4		37	2482	2519	98.5312	33083.8		35	3506	3541	99.0116	45101.8
nad4	1432	46	2158	2204	97.9129	28220.1		76	2962	3038	97.4984	36302.1		41	2288	2329	98.2396	29991.8		63	3102	3165	98.0095	35958.8
nad4	1433	36	2153	2189	98.3554	28641.4		0	3012	3012	100	42394.1		35	2283	2318	98.4901	31964.1		9	3117	3126	99.7121	41605.1
nad4	1452	1684	320	2004	15.9681	1635.77		2412	353	2765	12.7667	1075.77		1883	287	2170	13.2258	966.437		2319	396	2715	14.5856	1482.1
nad4L	41	1496	247	1743	14.171	777.437		861	129	990	13.0303	457.27		—	—	—	—	—		999	364	1363	26.7058	2321.1
nad4L	110	2005	662	2667	24.8219	4005.1		2555	342	2897	11.8053	6215.1		1376	183	1559	11.7383	397.77		—	—	—	—	—
nad4L	179	1229	352	1581	22.2644	3423.44		1702	374	2076	18.0154	2045.77		2077	261	2338	11.1634	537.437		1921	570	2491	22.8824	3236.77
nad5	1183	5036	2068	7104	29.1104	815.103		2646	403	3049	13.2174	1179.44		5371	604	5975	10.1088	244.437		4539	716	5255	13.6251	1887.77
nad5	1490	8	5074	5082	99.8426	69862.4		2	2499	2501	99.92	35553.1		5	5073	5078	99.9015	68797.8		7	4139	4146	99.8312	56229.4
nad5	1494	3425	1489	4914	30.3012	11990.1		1138	1268	2406	52.7016	11998.8		3504	1413	4917	28.737	10753.8		1964	2063	4027	51.2292	17653.4
nad5	1550	13	4940	4953	99.7375	72078.1		5	2351	2356	99.7878	33328.1		5	4974	4979	99.8996	73275.4		11	4150	4161	99.7356	58850.8
nad5	1567	1645	3285	4930	66.6329	33437.4		827	1497	2324	64.4148	14553.8		1609	3206	4815	66.5836	32040.8		1555	2756	4311	63.9295	24775.1
nad5	1580	1	4960	4961	99.9798	76182.4		6	2439	2445	99.7546	35443.4		21	4878	4899	99.5713	66866.1		11	4341	4352	99.7472	63360.4
nad5	1589	9	4941	4950	99.8182	74254.1		27	2428	2455	98.9002	28461.4		16	4863	4879	99.6721	73057.1		9	4367	4376	99.7943	60455.1
nad5	1665	887	4380	5267	83.1593	44971.1		625	2091	2716	76.9882	20585.1		901	4389	5290	82.9679	44133.4		1135	3682	4817	76.4376	34237.8
nad5	1859	4	2460	2464	99.8377	31342.8		1	1484	1485	99.9327	14898.1		13	2670	2683	99.5155	32106.4		5	2925	2930	99.8294	40868.1
nad5	1895	0	2921	2921	100	44564.8		0	1930	1930	100	21210.1		3	2928	2931	99.8976	40587.8		2	2789	2791	99.9283	36811.8
nad5	1900	14	2763	2777	99.4959	33974.4		2	1864	1866	99.8928	25666.4		7	2776	2783	99.7485	36780.1		0	2635	2635	100	40856.8
nad5	1901	41	2713	2754	98.5113	31800.4		1	1863	1864	99.9464	26993.4		18	2761	2779	99.3523	36201.4		7	2604	2611	99.7319	35026.4
nad5	1916	68	2407	2475	97.2525	26644.8		21	1712	1733	98.7882	20636.4		50	2445	2495	97.996	27345.1		31	2260	2291	98.6469	26096.8
nad5	1918	9	2466	2475	99.6364	32499.1		6	1744	1750	99.6571	23620.1		829	2489	3318	75.0151	35419.4		0	2324	2324	100	35725.1
nad5	2005	1569	279	1848	15.0974	1465.77		418	48	466	10.3004	76.77		1564	251	1815	13.8292	1157.1		498	65	563	11.5453	509.77
nad6	-45	2173	383	2556	14.9844	1875.1		2509	354	2863	12.3647	1490.77		2187	387	2574	15.035	2001.1		1590	218	1808	12.0575	666.437
nad6	-3	2027	694	2721	25.5053	5115.77		2367	882	3249	27.1468	6831.1		1985	957	2942	32.5289	7974.77		1153	1064	2217	47.9928	9570.44
nad6	25	235	2902	3137	92.5088	31161.8		2431	1488	3919	37.9689	11939.1		427	3089	3516	87.8555	30415.8		1613	1106	2719	40.6767	8040.1
nad6	26	238	2907	3145	92.4324	30277.4		611	3320	3931	84.4569	36223.4		273	3262	3535	92.2772	33550.8		329	2409	2738	87.9839	25794.9
nad6	88	109	2896	3005	96.3727	40698.8		564	3306	3870	85.4264	45520.4		143	3554	3697	96.132	51183.8		412	3119	3531	88.3319	43186.4
nad6	89	118	2905	3023	96.0966	36856.8		733	3183	3916	81.2819	35714.8		151	3578	3729	95.9507	49339.8		424	3142	3566	88.1099	43265.4
nad6	138	3707	1739	5446	31.9317	14054.1		4484	1014	5498	18.4431	6257.44		3676	2183	5859	37.2589	18371.1		4113	1961	6074	32.2851	13649.8
nad6	146	793	5277	6070	86.9357	59504.8		2209	3853	6062	63.5599	42248.1		750	5699	6449	88.3703	65237.1		2478	4102	6580	62.3404	39882.8
nad6	159	4893	3058	7951	38.4606	15343.1		5680	1050	6730	15.6018	5547.44		3853	3405	7258	46.9138	29624.1		5327	1916	7243	26.4531	11416.4
nad6	161	661	6459	7120	90.7163	77377.8		2060	4790	6850	69.927	55078.8		618	6737	7355	91.5976	83842.1		1607	5693	7300	77.9863	65285.4
nad6	169	300	7289	7589	96.0469	101321		466	6774	7240	93.5635	94132.8		334	7380	7714	95.6702	102759		413	7212	7625	94.5836	97616.8
nad6	191	385	8374	8759	95.6045	95014.4		1142	7197	8339	86.3053	82144.8		424	8525	8949	95.262	95902.4		1338	7011	8349	83.9741	68041.1
nad6	196	7470	1480	8950	16.5363	6702.77		7263	1276	8539	14.9432	6222.44		7830	1384	9214	15.0206	5400.1		7020	1450	8470	17.1192	5391.1
nad6	446	720	10037	10757	93.3067	105408		1946	5072	7018	72.2713	56947.8		657	10918	11575	94.324	113977		2063	6876	8939	76.9214	61836.4
nad6	569	200	3974	4174	95.2084	43479.8		1518	5018	6536	76.7748	47923.4		272	5082	5354	94.9197	55438.1		825	3658	4483	81.5971	33684.8
nad7	-7	526	58	584	9.93151	160.77		1154	481	1635	29.419	2992.1		1494	275	1769	15.5455	1077.77		1080	558	1638	34.0659	4050.1
nad7	38	13	2182	2195	99.4077	29113.4		26	1989	2015	98.7097	23722.8		5	2311	2316	99.7841	28952.1		48	2200	2248	97.8648	24614.4
nad7	44	6	2268	2274	99.7361	30509.1		0	2073	2073	100	31778.8		8	2403	2411	99.6682	32674.8		2	2339	2341	99.9146	30995.1
nad7	45	0	2291	2291	100	35455.1		0	2079	2079	100	32070.4		8	2419	2427	99.6704	33000.8		9	2349	2358	99.6183	31526.7
nad7	77	10	3074	3084	99.6757	41994.1		—	—	—	—	—		18	3378	3396	99.47	42220.4		—	—	—	—	—
nad7	83	9	3280	3289	99.7264	43564.4		1	2689	2690	99.9628	41304.8		8	3619	3627	99.7794	49771.4		12	3744	3756	99.6805	48592.8
nad7	99	1132	1534	2666	57.5394	15232.4		733	1181	1914	61.7032	11632.1		1006	2173	3179	68.3548	21278.1		602	2969	3571	83.142	28880.1
nad7	137	16	4297	4313	99.629	53292.4		11	3126	3137	99.6493	39490.4		13	5059	5072	99.7437	64117.4		15	5602	5617	99.733	65339.1
nad7	209	5	5319	5324	99.9061	75714.1		21	4982	5003	99.5803	65096.4		9	5562	5571	99.8384	77172.4		2	8281	8283	99.9759	125936
nad7	224	67	5492	5559	98.7947	65005.8		50	5293	5343	99.0642	58597.1		0	5851	5851	100	90018.4		0	8789	8789	100	134884
nad7	244	6	5957	5963	99.8994	87360.4		9	5731	5740	99.8432	79539.1		0	6170	6170	100	94181.4		45	9400	9445	99.5236	120332
nad7	251	5	6029	6034	99.9171	87769.1		3	5785	5788	99.9482	83779.1		0	6200	6200	100	94891.4		10	9466	9476	99.8945	138167
nad7	255	3895	2048	5943	34.4607	18354.4		2953	2771	5724	48.4102	24155.8		3199	2935	6134	47.8481	28465.1		3363	5932	9295	63.8193	52749.4
nad7	315	3	6816	6819	99.956	99305.1		6	6298	6304	99.9048	90680.1		0	6695	6695	100	102754		4	5849	5853	99.9317	82920.4
nad7	335	0	6847	6847	100	107402		2	6449	6451	99.969	100054		0	6855	6855	100	106703		0	5137	5137	100	80144.4
nad7	344	1	6938	6939	99.9856	108360		2	6560	6562	99.9695	101076		0	6856	6856	100	106548		71	4708	4779	98.5143	53353.8
nad7	353	1	7073	7074	99.9859	109888		3	6707	6710	99.9553	104399		0	7046	7046	100	109726		14	4492	4506	99.6893	65668.1
nad7	383	13	7589	7602	99.829	105415		7	7441	7448	99.906	105562		4	7660	7664	99.9478	109722		10	4466	4476	99.7766	64917.1
nad7	445	32	5736	5768	99.4452	71069.1		14	6456	6470	99.7836	81362.8		6	6019	6025	99.9004	79323.8		13	5156	5169	99.7485	68368.8
nad7	533	181	4666	4847	96.2657	59949.8		245	5912	6157	96.0208	72520.1		48	5166	5214	99.0794	67096.1		221	5160	5381	95.893	63885.4
nad7	578	19	5757	5776	99.6711	78889.4		8	7291	7299	99.8904	101924		4	5733	5737	99.9303	82461.8		6	6024	6030	99.9005	85188.8
nad7	679	45	5633	5678	99.2075	70903.4		210	6133	6343	96.6893	74177.8		10	5425	5435	99.816	75320.8		41	4314	4355	99.0586	55888.4
nad7	698	52	4992	5044	98.9691	62987.4		85	6122	6207	98.6306	78026.1		34	4725	4759	99.2856	63002.8		6	4199	4205	99.8573	62012.1
nad7	724	1	4906	4907	99.9796	75577.8		12	5923	5935	99.7978	85470.1		0	4590	4590	100	70849.4		8	4249	4257	99.8121	61065.1
nad7	734	84	4748	4832	98.2616	62637.4		147	5628	5775	97.4545	71834.8		70	4439	4509	98.4475	59172.4		59	4123	4182	98.5892	55203.4
nad7	739	9	4709	4718	99.8092	65618.8		18	5651	5669	99.6825	81819.8		4	4443	4447	99.9101	65283.4		24	4068	4092	99.4135	51876.1
nad7	769	6	4563	4569	99.8687	67088.1		0	5500	5500	100	84051.1		0	4429	4429	100	67766.4		5	4193	4198	99.8809	61464.4
nad7	836	3	4278	4281	99.9299	60420.4		9	4909	4918	99.817	68712.8		8	4198	4206	99.8098	58256.8		5	3948	3953	99.8735	56403.4
nad7	926	11	9517	9528	99.8846	125071		26	7365	7391	99.6482	93489.1		5	8569	8574	99.9417	118294		13	5182	5195	99.7498	71683.8
nad7	973	27	7101	7128	99.6212	83004.4		77	5289	5366	98.565	41854.4		18	6168	6186	99.709	83232.4		65	4009	4074	98.4045	49659.8
nad7	1088	6	3695	3701	99.8379	45654.1		263	2962	3225	91.845	28068.4		50	4011	4061	98.7688	42172.1		339	4287	4626	92.6719	42026.8
nad7	1103	19	3236	3255	99.4163	41053.8		4	2945	2949	99.8644	40350.8		7	3511	3518	99.801	44129.1		41	3910	3951	98.9623	41846.4
nad7	1124	13	2805	2818	99.5387	36308.4		1	2613	2614	99.9617	38870.4		2	2890	2892	99.9308	40009.1		20	3187	3207	99.3764	36803.4
nad9	14	196	1727	1923	89.8076	19878.8		530	1346	1876	71.7484	14841.8		237	1539	1776	86.6554	16661.4		169	1306	1475	88.5424	13549.8
nad9	92	542	2694	3236	83.2509	26556.1		1042	2055	3097	66.3545	17695.4		725	2270	2995	75.793	20342.1		747	1996	2743	72.767	17442.1
nad9	111	2442	437	2879	15.1789	2040.77		2390	322	2712	11.8732	869.437		2379	400	2779	14.3937	1348.1		2228	522	2750	18.9818	2771.44
nad9	113	431	2532	2963	85.4539	28603.8		919	1883	2802	67.202	19498.1		480	2344	2824	83.0028	24468.4		726	2113	2839	74.4276	19985.1
nad9	167	484	5006	5490	91.184	53412.1		924	4257	5181	82.1656	48262.4		788	4623	5411	85.4371	44842.1		305	4315	4620	93.3983	56257.1
nad9	190	1247	5364	6611	81.1375	52288.4		2775	3590	6365	56.4022	30527.1		1186	5393	6579	81.9729	49262.1		2889	3994	6883	58.027	33568.1
nad9	223	1265	7451	8716	85.4865	69861.8		2195	5793	7988	72.5213	51034.1		1605	6646	8251	80.5478	58817.1		1342	5452	6794	80.2473	45502.1
nad9	298	777	9100	9877	92.1332	89820.8		2092	7032	9124	77.0715	64432.1		1143	8284	9427	87.8753	78677.1		1163	6691	7854	85.1923	58193.4
nad9	311	547	9066	9613	94.3098	95072.1		1834	7164	8998	79.6177	71322.8		695	8549	9244	92.4816	108843		675	7031	7706	91.2406	89343.8
nad9	328	871	8335	9206	90.5388	80418.1		1776	6870	8646	79.4587	68509.4		910	7994	8904	89.7799	75763.1		713	6793	7506	90.5009	64410.1
nad9	356	1624	6384	8008	79.7203	62257.8		3665	3939	7604	51.8017	33569.1		1175	6531	7706	84.7521	61191.4		1991	4675	6666	70.132	38142.1
nad9	368	653	6835	7488	91.2794	69168.8		2056	5100	7156	71.2689	51546.8		665	6643	7308	90.9004	65021.1		1047	5273	6320	83.4335	45980.1
nad9	398	286	6030	6316	95.4718	65937.8		1094	4807	5901	81.4608	47835.8		471	5497	5968	92.1079	55616.1		674	4744	5418	87.56	42076.8
rpl16	48	120	921	1041	88.4726	12037.8		242	739	981	75.3313	9687.44		87	615	702	87.6068	8039.77		154	323	477	67.7149	3995.1
rpl16	79	285	1221	1506	81.0757	13035.8		241	1308	1549	84.4416	14500.4		326	866	1192	72.651	9016.1		216	653	869	75.1438	6587.44
rpl16	93	281	1571	1852	84.8272	15920.1		372	1648	2020	81.5842	17037.1		174	1348	1522	88.5677	13212.4		223	1030	1253	82.2027	9603.44
rpl16	184	488	3684	4172	88.303	34353.1		649	5095	5744	88.7013	45157.8		541	3891	4432	87.7933	33482.4		489	3900	4389	88.8585	31990.8
rpl16	225	226	4914	5140	95.6031	59239.8		683	6490	7173	90.4782	70290.4		246	5192	5438	95.4763	69124.8		311	4780	5091	93.8912	55966.8
rpl16	227	362	4772	5134	92.949	54151.1		788	6381	7169	89.0082	67192.8		462	4970	5432	91.4948	54637.1		332	4694	5026	93.3943	55025.1
rpl16	228	3195	2024	5219	38.7814	15542.8		5232	2064	7296	28.2895	13119.1		3289	2228	5517	40.3843	15920.1		2535	2552	5087	50.1671	18845.4
rpl16	287	1502	4265	5767	73.9553	38030.1		1791	6391	8182	78.1105	54972.1		989	5059	6048	83.6475	43269.1		961	4404	5365	82.0876	36380.8
rpl16	355	1024	3588	4612	77.7971	33585.4		2425	3862	6287	61.4283	33721.1		1079	3573	4652	76.8057	31462.1		1208	3053	4261	71.6498	25145.4
rpl16	444	1400	2324	3724	62.406	19972.4		1335	2814	4149	67.8236	24545.8		1295	1911	3206	59.607	15212.8		802	2271	3073	73.9017	19356.8
rpl16	458	354	3160	3514	89.926	30887.1		504	2019	2523	80.0238	28060.8		276	2662	2938	90.6059	25374.8		580	2219	2799	79.2783	19780.4
rpl16	524	320	2275	2595	87.6686	24395.8		293	2422	2715	89.2081	25588.8		299	1845	2144	86.0541	19146.1		228	1754	1982	88.4965	17413.8
rpl16	530	56	2490	2546	97.8005	32807.4		145	2510	2655	94.5386	31624.4		92	2000	2092	95.6023	24707.8		116	1814	1930	93.9896	20044.4
rps1	107	1196	1809	3005	60.1997	15793.8		2473	1009	3482	28.9776	6607.44		927	1347	2274	59.2348	10753.8		1633	958	2591	36.9741	6479.77
rps1	377	869	2501	3370	74.2136	23805.4		994	2641	3635	72.6547	25235.1		517	1498	2015	74.3424	14033.4		521	1908	2429	78.5508	17337.8
rps1	505	1633	303	1936	15.6508	1508.77		1516	422	1938	21.775	3029.1		1098	348	1446	24.0664	2501.44		1998	423	2421	17.4721	3298.44
rps2A	200	379	835	1214	68.7809	10454.8		139	988	1127	87.6664	12745.8		364	740	1104	67.029	9341.1		145	1010	1155	87.4459	13198.4
rps2A	449	3769	4526	8295	54.563	41859.4		619	8327	8946	93.0807	91504.8		3947	4953	8900	55.6517	46960.4		623	8924	9547	93.4744	101244
rps2A	514	3770	3945	7715	51.1342	38536.8		752	7394	8146	90.7685	83778.1		3942	4152	8094	51.2973	41765.8		706	7514	8220	91.4112	87538.1
rps2A	541	3887	3917	7804	50.1922	37875.8		378	7878	8256	95.4215	91735.4		3942	4048	7990	50.6633	40747.1		343	7659	8002	95.7136	92197.1
rps2A	548	3293	4569	7862	58.115	45658.8		448	7831	8279	94.5887	89411.8		3315	4712	8027	58.7019	48690.1		415	7592	8007	94.817	90279.4
rps2b	15	955	1273	2228	57.1364	9903.77		1036	818	1854	44.1208	8229.77		664	887	1551	57.1889	8768.1		546	844	1390	60.7194	8193.44
rps2b	206	339	1057	1396	75.7163	13434.8		274	778	1052	73.9544	9877.44		93	566	659	85.8877	7239.44		66	366	432	84.7222	4685.77
rps2b	455	555	7970	8525	93.4897	92916.1		458	7223	7681	94.0372	85270.4		888	7151	8039	88.9538	69527.1		146	7847	7993	98.1734	80729.8
rps2b	510	6795	819	7614	10.7565	2184.1		5361	1327	6688	19.8415	9161.77		5470	1775	7245	24.4997	11565.1		4616	2161	6777	31.8873	14714.4
rps2b	526	6913	656	7569	8.66693	530.103		4105	408	4513	9.04055	682.27		6472	786	7258	10.8294	1152.77		5653	1073	6726	15.953	3971.43
rps2b	550	1498	6489	7987	81.2445	75937.1		504	6457	6961	92.7597	78336.4		973	6382	7355	86.7709	67080.4		212	6589	6801	96.8828	72970.4
rps2b	557	380	7706	8086	95.3005	94547.8		287	6744	7031	95.9181	84383.8		493	6941	7434	93.3683	73826.1		126	6664	6790	98.1443	77622.8
rps3	64	42	1693	1735	97.5793	19530.1		15	1304	1319	98.8628	17077.8		59	1911	1970	97.0051	22687.1		32	2350	2382	98.6566	28898.4
rps3	69	362	1383	1745	79.255	13675.8		577	765	1342	57.0045	6283.77		495	1545	2040	75.7353	14517.1		1038	1441	2479	58.1283	11346.1
rps3	92	3	2135	2138	99.8597	30036.4		9	1616	1625	99.4462	21010.8		15	2584	2599	99.4229	31051.8		18	3521	3539	99.4914	40728.8
rps3	314	4176	1216	5392	22.5519	6540.77		2458	1870	4328	43.207	14864.1		7077	1812	8889	20.3847	8565.77		5529	4334	9863	43.942	36237.1
rps3	497	3581	1717	5298	32.4085	12311.8		1636	1738	3374	51.5116	12633.1		5344	2406	7750	31.0452	14198.1		2968	3017	5985	50.4094	23041.1
rps3	503	406	5024	5430	92.523	51698.4		70	3373	3443	97.9669	35641.4		656	7279	7935	91.7328	71975.4		93	6032	6125	98.4816	70694.4
rps3	707	3835	2006	5841	34.3434	15274.8		519	2726	3245	84.0062	26902.4		4699	2476	7175	34.5087	18192.4		1374	7456	8830	84.4394	72436.1
rps3	878	4550	1445	5995	24.1034	9193.1		2916	566	3482	16.255	1966.77		6321	2092	8413	24.8663	12685.4		6038	1311	7349	17.8392	6530.44
rps3	1019	1399	3264	4663	69.9979	27852.1		792	1592	2384	66.7785	13330.8		1452	3335	4787	69.6679	28305.4		1116	2380	3496	68.0778	20448.1
rps3	1066	4355	1074	5429	19.7826	5745.1		1919	1380	3299	41.8309	10699.1		4938	1217	6155	19.7725	6923.1		3019	2094	5113	40.9544	19400.1
rps3	1576	33	1718	1751	98.1154	18516.1		116	984	1100	89.4545	8498.44		21	2006	2027	98.964	21617.1		231	2473	2704	91.4571	23620.4
rps3	1607	31	1035	1066	97.0919	11658.1		44	571	615	92.8455	6095.77		29	1075	1104	97.3732	12520.4		94	1054	1148	91.8118	11529.8
rps3	1621	9	847	856	98.9486	12325.4		20	462	482	95.8506	6626.1		7	824	831	99.1576	12092.1		18	776	794	97.733	10569.1
rps4	-9	912	883	1795	49.1922	9027.1		1050	709	1759	40.307	6491.1		537	939	1476	63.6179	9668.44		629	787	1416	55.5791	7310.77
rps4	38	592	1551	2143	72.3752	16339.4		683	1399	2082	67.195	13956.4		528	1342	1870	71.7647	13170.4		610	1110	1720	64.5349	10026.8
rps4	49	278	2049	2327	88.0533	21242.4		261	1915	2176	88.0055	19352.4		354	1642	1996	82.2645	17503.8		71	1754	1825	96.1096	17777.8
rps4	164	1923	2838	4761	59.6093	26173.8		1892	1905	3797	50.1712	16456.4		1273	2330	3603	64.6683	21347.1		2154	1848	4002	46.1769	14368.1
rps4	278	909	6414	7323	87.5871	65533.1		554	5620	6174	91.0269	61464.1		1030	4553	5583	81.5511	44170.1		245	5624	5869	95.8255	62422.1
rps4	290	2074	5214	7288	71.5423	51914.1		2199	4017	6216	64.6236	37904.1		1375	4221	5596	75.4289	40959.8		1281	4534	5815	77.9708	40949.8
rps4	335	1253	6377	7630	83.578	64935.4		1057	5486	6543	83.8453	54020.8		1185	4363	5548	78.641	42476.1		522	5317	5839	91.0601	50215.8
rps4	482	2318	4518	6836	66.0913	43881.4		2003	4372	6375	68.5804	42229.1		1989	2851	4840	58.905	25957.4		1283	3318	4601	72.1148	29560.1
rps4	549	4047	3160	7207	43.8463	27539.1		5340	1645	6985	23.5505	10458.8		2608	2599	5207	49.9136	23200.4		3491	1895	5386	35.1838	12835.8
rps4	870	3433	691	4124	16.7556	2897.44		—	—	—	—	—		2576	842	3418	24.6343	5073.77		—	—	—	—	—
rps4	915	453	2238	2691	83.1661	22304.8		548	1747	2295	76.122	16921.8		422	1872	2294	81.6042	18504.8		359	2339	2698	86.6938	21752.1
rps4	944	846	1033	1879	54.9761	10044.8		695	910	1605	56.6978	8734.1		606	1050	1656	63.4058	10253.4		830	1205	2035	59.2138	10569.4
rps4	955	500	2056	2556	80.4382	21604.1		483	1801	2284	78.8529	17932.8		552	1650	2202	74.9319	16280.1		450	1998	2448	81.6176	17221.8
rps4	980	448	1691	2139	79.0556	16513.8		1007	924	1931	47.8509	7439.77		459	1402	1861	75.3358	13341.1		1004	1023	2027	50.4687	8019.77
rps4	1031	217	1467	1684	87.114	16098.8		245	1348	1593	84.6202	15786.1		256	1176	1432	82.1229	13180.8		111	1331	1442	92.3024	14564.1
rps4	1040	244	1382	1626	84.9938	16227.8		287	1259	1546	81.436	16579.8		256	1122	1378	81.4224	14013.4		239	1136	1375	82.6182	11315.1
rps4	1045	354	1249	1603	77.9164	13545.4		407	1094	1501	72.8847	11061.4		314	1031	1345	76.6543	10700.8		277	1057	1334	79.2354	10464.1
rps7	-114	1366	609	1975	30.8354	5450.1		1546	550	2096	26.2405	4527.1		1074	482	1556	30.9769	3845.77		808	246	1054	23.3397	1490.1
rps7	-68	902	1610	2512	64.0924	15990.4		1297	1423	2720	52.3162	12802.4		559	1359	1918	70.8551	12712.8		787	697	1484	46.9677	5437.44
rps7	277	3416	4116	7532	54.6468	36565.1		5903	2747	8650	31.7572	19395.4		2419	3804	6223	61.1281	31592.8		4729	2065	6794	30.3945	12341.8
rps7	332	1183	4031	5214	77.3111	40544.4		2420	3689	6109	60.3863	33697.4		749	3649	4398	82.9695	35839.4		1731	3046	4777	63.7639	26138.1
rps7	520	1952	266	2218	11.9928	875.73		2177	289	2466	11.7194	905.063		1005	589	1594	36.9511	4709.74		1179	311	1490	20.8725	1857.4
rps12	71	570	1796	2366	75.9087	16815.8		1817	935	2752	33.9753	6378.77		772	1490	2262	65.8709	12597.1		1314	1106	2420	45.7025	7915.44
rps12	196	374	3545	3919	90.4567	34073.4		1205	3051	4256	71.687	27060.8		677	3538	4215	83.9383	30779.4		803	2596	3399	76.3754	23044.1
rps12	221	1126	2551	3677	69.3772	23674.1		2066	1902	3968	47.9335	15657.8		1301	1876	3177	59.0494	16101.4		1731	2162	3893	55.5356	17723.4
rps12	269	867	2029	2896	70.0622	21227.1		1187	1590	2777	57.256	14875.1		766	1472	2238	65.773	14158.1		676	1931	2607	74.0698	17896.8
rps12	284	420	1966	2386	82.3973	21824.4		986	1507	2493	60.4493	14765.1		578	1400	1978	70.7786	15595.8		553	1666	2219	75.0789	16057.1
rps12	289	1853	1240	3093	40.0905	8569.1		1937	1291	3228	39.9938	8846.1		1629	926	2555	36.2427	5951.1		1169	1551	2720	57.0221	11832.4
rps12_ct	418	272	5332	5604	95.1463	59271.8		4056	2636	6692	39.3903	21480.1		873	4402	5275	83.4502	44164.4		3365	1444	4809	30.027	9685.1
rps13	5	1483	2618	4101	63.8381	24533.1		1990	1580	3570	44.2577	12734.4		723	2254	2977	75.7138	20691.8		987	1600	2587	61.8477	13536.8
rps13	26	992	3799	4791	79.2945	35387.4		1737	2239	3976	56.3129	18174.4		665	2723	3388	80.3719	24795.1		905	2118	3023	70.0629	17765.1
rps13	56	2162	1787	3949	45.252	16147.1		1852	1070	2922	36.6188	9170.77		1086	1745	2831	61.639	17062.1		1286	1532	2818	54.3648	13194.4
rps13	100	2114	3714	5828	63.7268	34051.8		2477	2018	4495	44.8943	16964.8		1354	2822	4176	67.5766	25470.8		1645	2554	4199	60.824	20579.1
rps13	256	1888	2948	4836	60.9595	27300.8		2400	1845	4245	43.4629	15457.1		1158	2731	3889	70.2237	25687.1		2097	1994	4091	48.7411	15038.1
rps13	287	1798	1889	3687	51.2341	17116.8		2129	1451	3580	40.5307	12530.1		1079	2091	3170	65.9621	19889.4		1542	1783	3325	53.6241	14425.1
